# Supplementary material
Source: publisher figshare collection journal article supplement (https://aacr.figshare.com/articles/dataset/_/22479614)
Supplement: Supplementary file 1 [file 39931112]

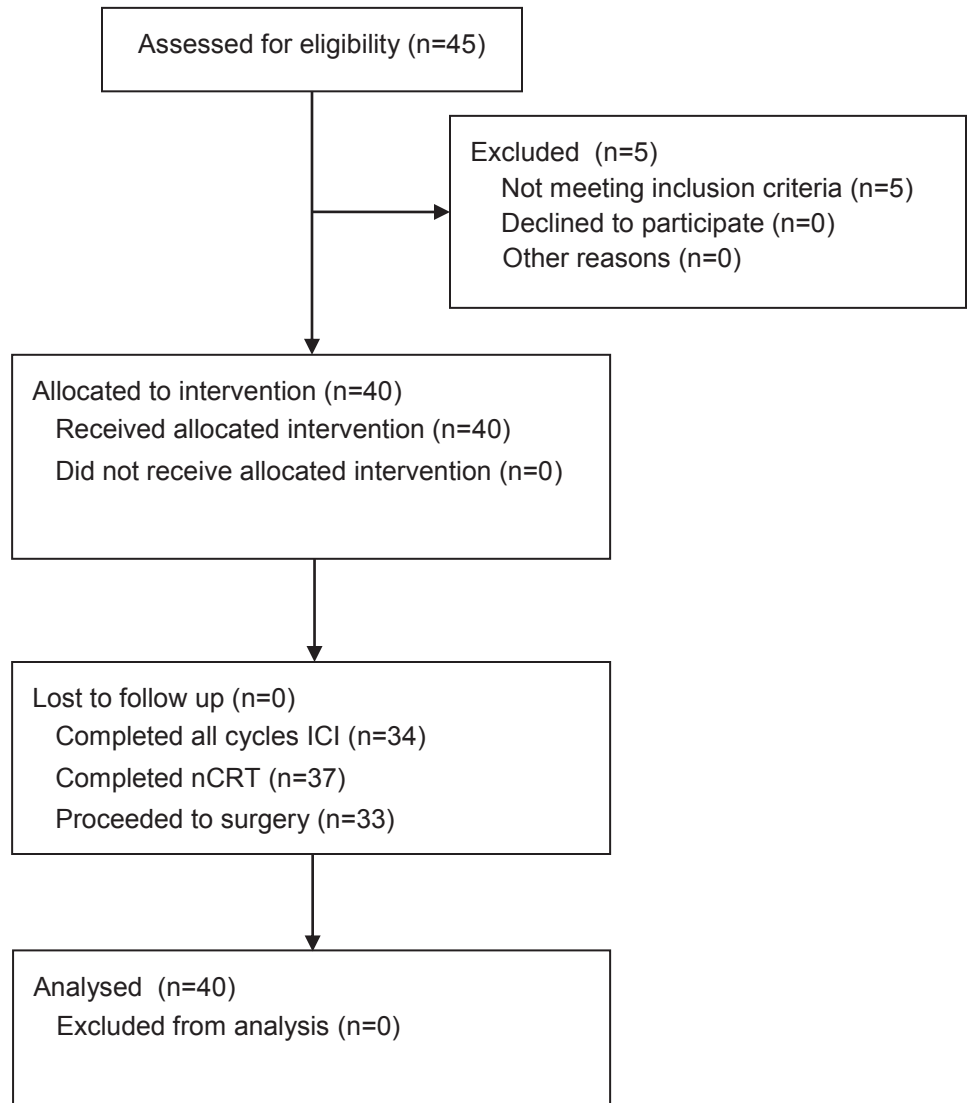

**Supplementary Figure 2. Flowchart of patients included in the PERFECT trial.**

Abbreviations: ICI = Immune checkpoint inhibitor; nCRT = neoadjuvant chemoradiotherapy.
